# Supplementary material
Source: PubMed Central journal article supplement (PMC10948377)
Supplement: NIHMS1935122-supplement-supplementary_material.pdf [file NIHMS1935122-supplement-supplementary_material.pdf]

## Supplementary Material

In addition to the authors, other members of the Eunice Kennedy Shriver National Institute of Child Health and Human Development Maternal-Fetal Medicine Units Network and Neonatal Research Network are as follows:

*University of Utah and Intermountain Healthcare, Salt Lake City, UT* – E. Clark, L. Fullmer, K. Anderson, A. Guzman, M. Jensen, L. Williams.

*University of Alabama at Birmingham and Children's Hospital of Alabama, Birmingham, AL* – W. A. Carlo, N. Ambalavanan, M. V. Collins, S. S. Cosby, J. C. Hauth, A. Northen, T. Hill-Webb, S. Tate, K. Nelson, F. Biasini.

*University of Texas Southwestern Medical Center, Parkland Health & Hospital System, and Children's Medical Center Dallas, Dallas, TX* – P. J. Sánchez, K. J. Leveno (deceased), A. R. Lupton, W. A. Salhab, S. Madison, N. A. Miller, G. Hensley, A. Guzman, M. L. Sherman, J. Dax, L. Faye-Randall, C. Melton, E. Flores.

*Case Western Reserve University-MetroHealth Medical Center and Rainbow Babies & Children's Hospital, Cleveland, OH* – M. C. Walsh, A. A. Fanaroff, N. S. Newman, B. S. Siner, M. Collin, G. VanBuren, C. Milluzzi, M. Fundzak, C. Santori.

*The Ohio State University, Columbus, OH* – F. Johnson, J. Iams, M. B. Landon, C. Latimer, V. Curry, S. Meadows.

*Thomas Jefferson University, Philadelphia, PA* – R. Wapner, A. Sciscione, M. M. DiVito, M. Talucci, S. Desai, D. Paul.

*University of Tennessee, Memphis, TN* – S. B. Korones, H. S. Bada, T. Hudson, B. M. Sibai, R. Ramsey, W. Mabie, L. Kao, M. Cassie.

*Wayne State University, Hutzel Women's Hospital, and Children's Hospital of Michigan, Detroit, MI* – S. Shankaran, B. G. Sood, G. G. Konduri, R. Bara, G. Muran, G. S. Norman, D. Driscoll, B. Steffy, M. P. Dombrowski.

*Wake Forest University Health Sciences, Winston-Salem, NC* – M. Harper, P. J. Meis, M. Swain, K. Klinepeter, M. O'Shea, L. Steele.

*University of North Carolina at Chapel Hill, Chapel Hill, NC* – K. J. Moise, Jr., S. Brody, J. Bernhardt, K. Dorman.

*University of Texas Health Science Center at Houston-Children's Memorial Hermann Hospital and Lyndon B. Johnson General Hospital, Houston, TX* – K. A. Kennedy, J. E. Tyson, E. G. Akpa, P. A. Cluff, C. I. Franco, A. E. Lis, G. E. McDavid, P. P. Tate, L. C. Gilstrap, III, M. C. Day, E. Gildersleve, F. Ortiz, M. Kerr.

*Columbia University, New York, NY* – F. Malone, V. Pemberton, L. Paley, C. Paley, S. Bousleiman, V. Carmona.

*Brown University, Providence, RI* – J. Tillinghast, D. Allard, B. Vohr, L. Noel, K. McCarten.

*University of Cincinnati, University Hospital, and Cincinnati Children's Hospital Medical Center, Cincinnati, OH* – K. Schibler, E. F. Donovan, V. Narendran, B. Alexander, C. Grisby, J. Hessling, M. W. Mersmann, H. L. Mincey, N. Elder, M. Miodovnik, W. Girdler, T. Gratton.

*University of Chicago, Chicago, IL* – A. Moawad, M. Lindheimer, P. Jones.

*University of Miami and Holtz Children's Hospital, Miami, FL* – S. Duara, C. R. Bauer, R. Everett-Thomas, F. Doyle, C. Alfonso, M. Scott, R. Washington.

*Northwestern University, Chicago, IL* – G. Mallett, M. Ramos-Brinson, P. Simon.

*University of Texas Medical Branch, Galveston, TX* – T. Wen, L. A. Goodrum, G. Hankins, G. L. Olson, H. M. Harirah, E. Martin.

*University of Texas Health Sciences Center at San Antonio, San Antonio, TX* – E. Xenakis, D. Conway, M. Berkus.

*University of Pittsburgh, Pittsburgh, PA* – T. Kamon (deceased), M. Cotroneo, C. Milford.

*Duke University School of Medicine University Hospital, Alamance Regional Medical Center, and Durham Regional Hospital, Durham, NC* – R. N. Goldberg, K. J. Auten.

*Emory University, Children's Healthcare of Atlanta, Grady Memorial Hospital, and Emory Crawford Long Hospital, Atlanta, GA* – B. J. Stoll, E. C. Hale.

*Stanford University, Lucile Packard Children's Hospital, Palo Alto, CA* – K. P. Van Meurs, D. K. Stevenson, M. B. Ball.

*University of California San Diego Medical Center and Sharp Mary Birch Hospital for Women, San Diego, CA* – N. N. Finer, M. R. Rasmussen, D. Kaegi, K. Arnell, C. Demetrio, W. Rich.

*University of Iowa Children's Hospital and Mercy Medical Center, Iowa City, IA* – E. F. Bell, J. C. Murray, K. J. Johnson.

*RTI International, Research Triangle Park, NC* – A. Das, S. A. McDonald, B. K. Hastings, J. O. Auman, K. M. Zaterka-Baxter.

*The George Washington University Biostatistics Center, Washington, DC* – E. Thom, S. J. Weiner, B. Jones-Binns, M. Cooney, M. Fischer, S. McLaughlin, K. Brunette, E. Fricks.

*National Institute of Neurological Disorders and Stroke, Bethesda, MD* – D. Hirtz, K. B. Nelson.

*Eunice Kennedy Shriver National Institute of Child Health and Human Development, Bethesda, MD* – R. D. Higgins, L. L. Wright, S. J. Yaffe, E. M. McClure, S. W. Archer, C. Spong, U. Reddy, S. Tolivaisa, D. McNellis, C. Catz, K. Howell.

MFNU Network Steering Committee Chair (*University of Pittsburgh, Pittsburgh, PA*) – J. Roberts.

NRN Steering Committee Chair (*University of Cincinnati, Cincinnati, OH*) – A. H. Jobe.
